# Supplementary material
Source: MDPI journal article supplement (https://www.mdpi.com/2073-4441/12/11/2992)
Supplement: s1 [file s1]

# Supplementary Materials

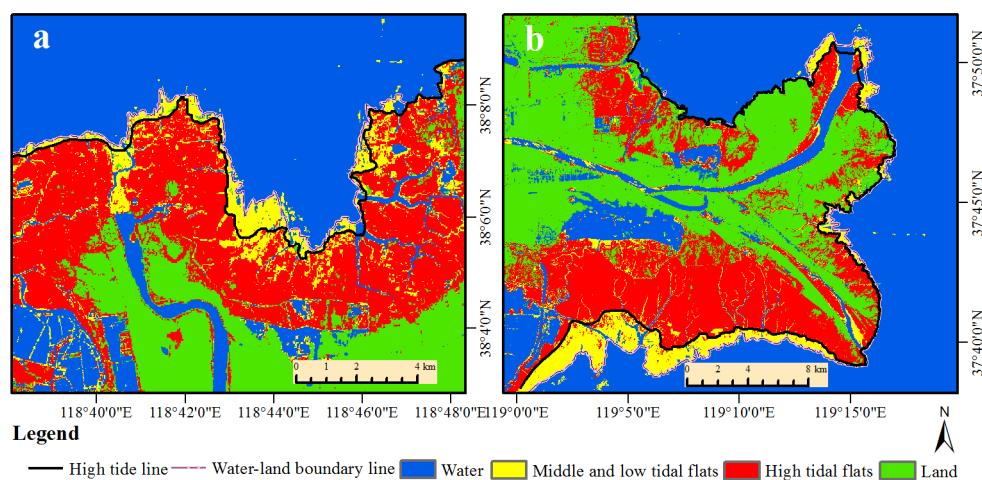

**Figure S1.** Extraction of the high tide line and water-land boundary line from the remote sensing classification for 2013.

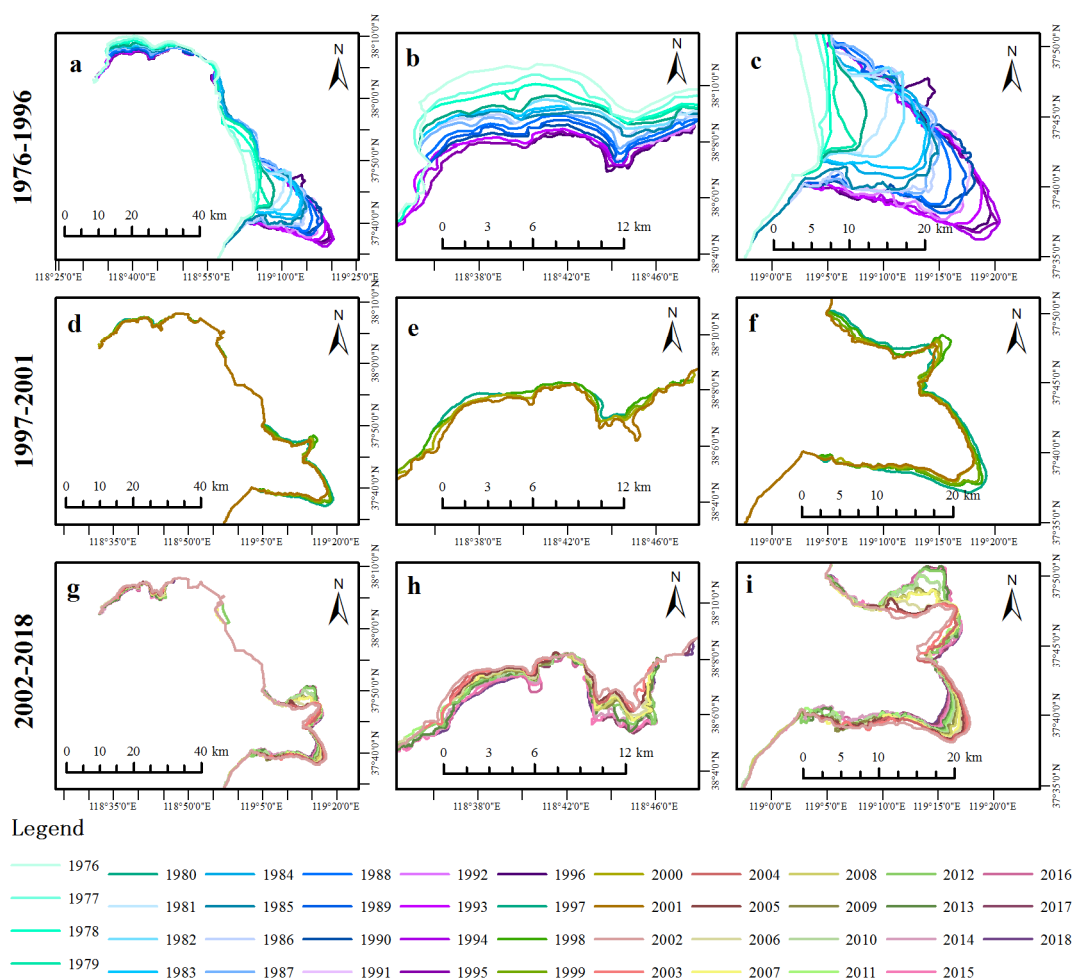

**Figure S2.** Spatiotemporal dynamic distributions of the coastline in the whole YRD (a,d,g), the northern coast (b,e,h) and the Yellow River Estuary (c,f,i) from 1976 to 2018.
